# Supplementary material for: CEP Biomarkers as Potential Tools for Monitoring Therapeutics
Source: PubMed Central journal article supplement (PMC3788138; doi:10.1371/journal.pone.0076325), 2013-10-01

## ***Supporting Figure S2***

***CEP immunoreactivity in rat retina.*** Western blots of retinal homogenates with anti-CEP monoclonal antibody are shown from blue light exposed rats pretreated with AL-8309A or vehicle, and from untreated dark control animals. Each lane represents one animal. Results from three separate animal experiments are shown: Experiment 1 (A-G), Experiment 2 (H-O), and Experiment 3 (P,Q). CEP immunoreactivity was quantified by densitometry as shown in the graphs where error bars represent standard deviation. The number of animals assayed in each group is indicated (n). CEP modified human serum albumin (CEP-HSA) was used as a positive control. Overall average results are presented in hardcopy Figure 2.

Fig S2 AB

CEP -HSA    Light + AL-8309A    Light + Vehicle    Dark Control    CEP -HSA

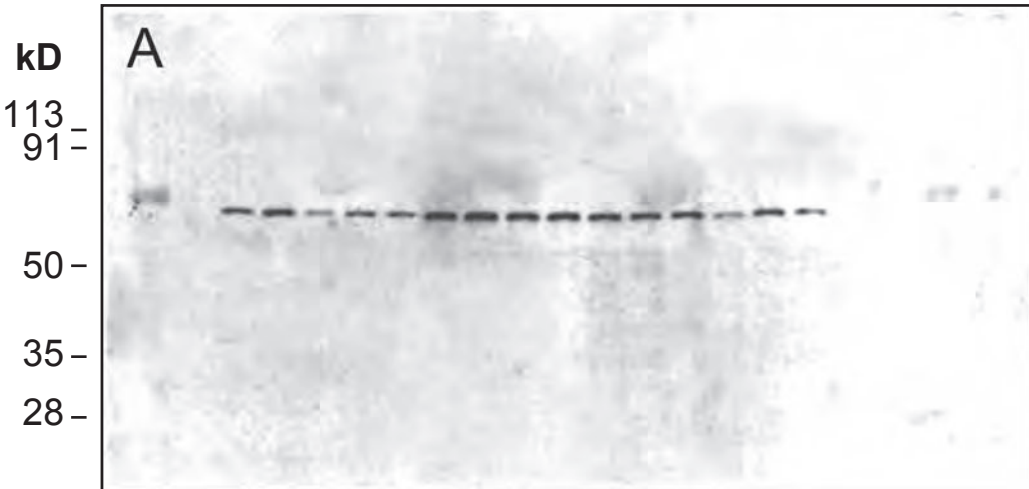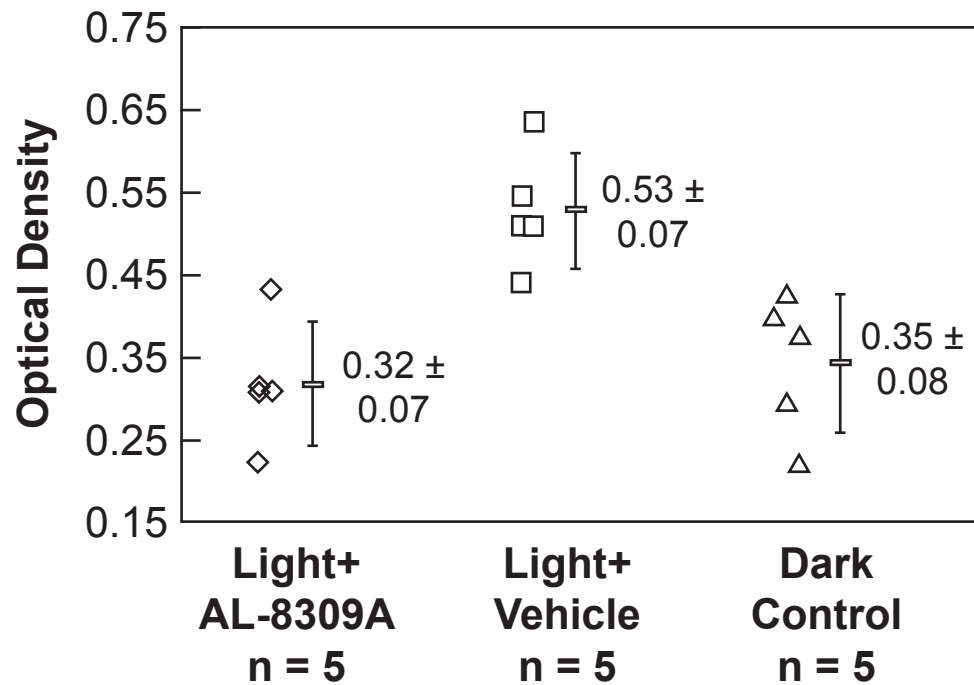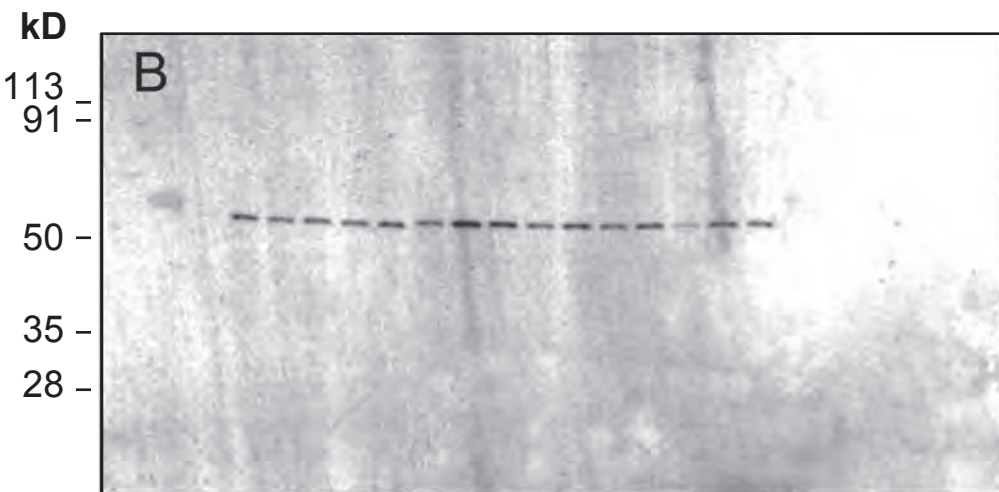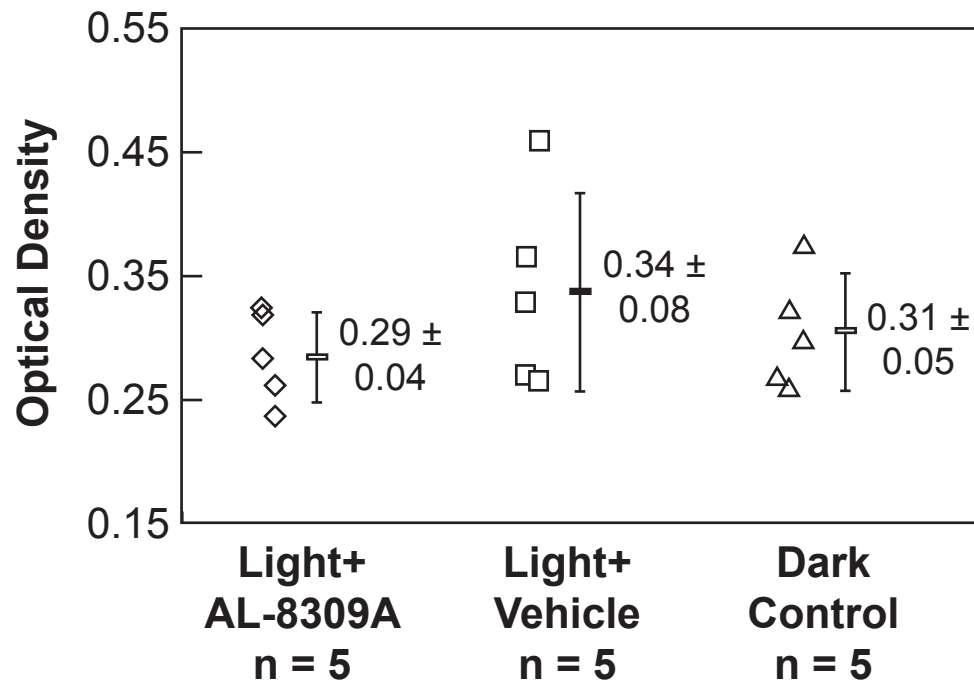

CEP Light + Light + Dark  
-HSA AL-8309A Vehicle Control CEP  
-HSA

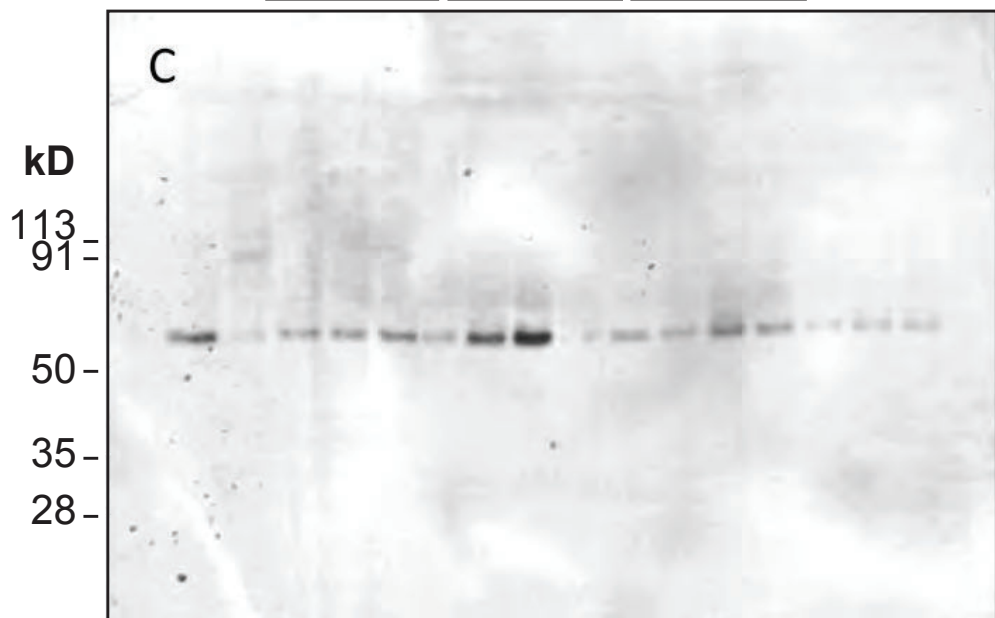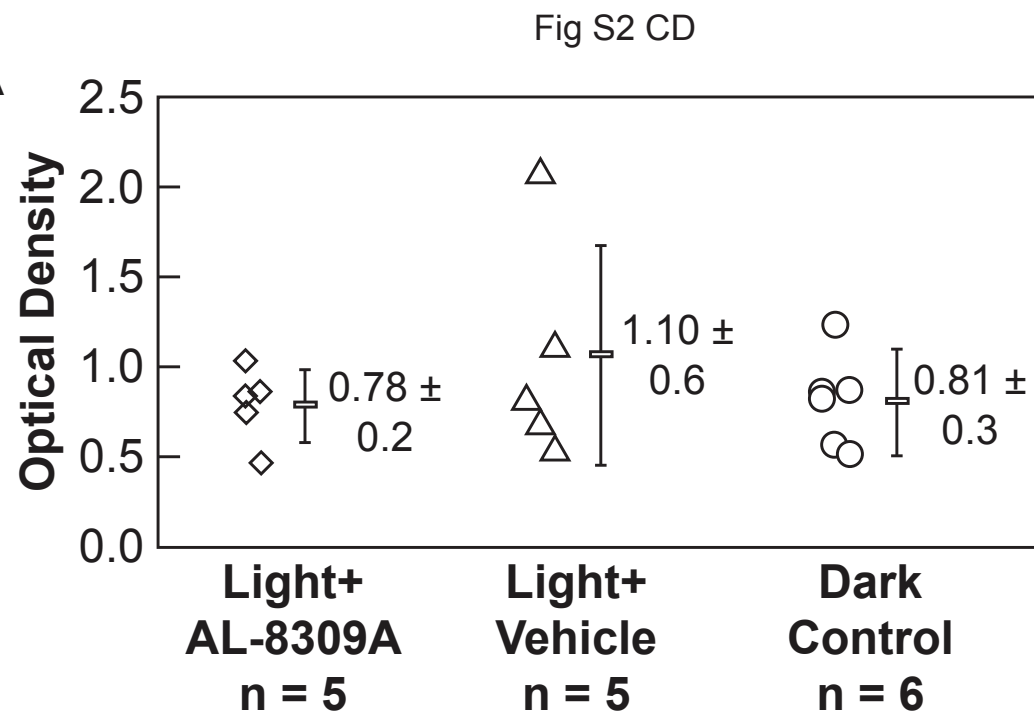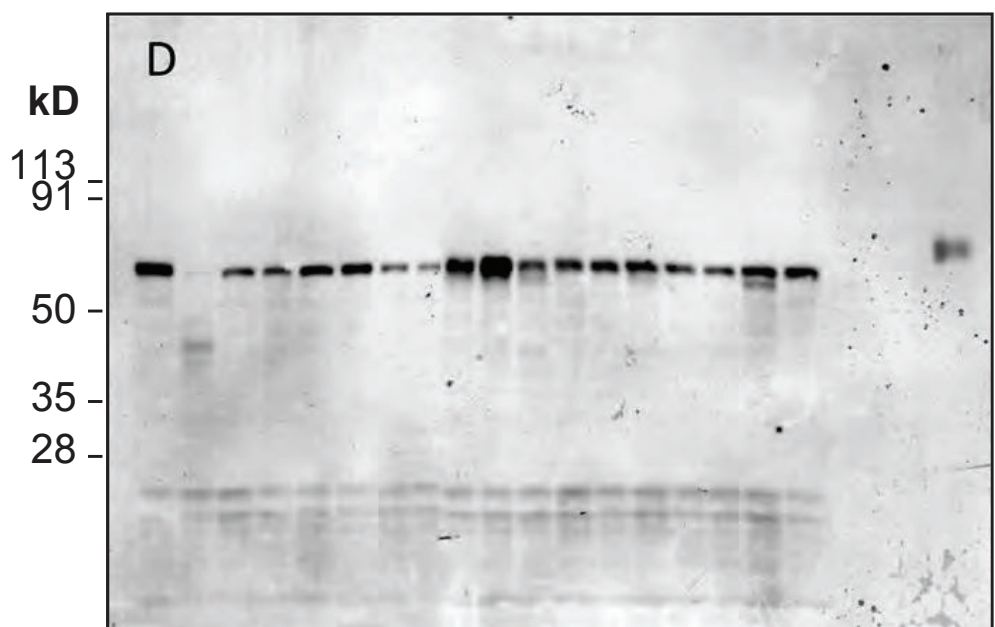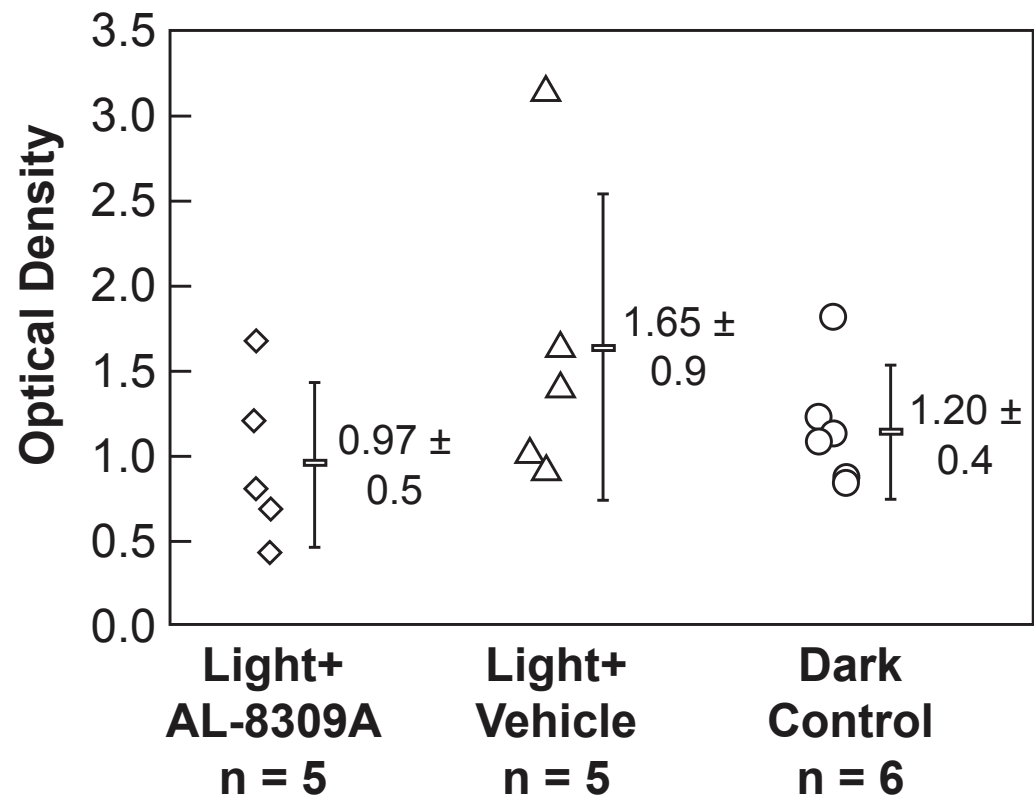

Light + AL-8309A    Light + Vehicle    Dark Control    CEP -HSA

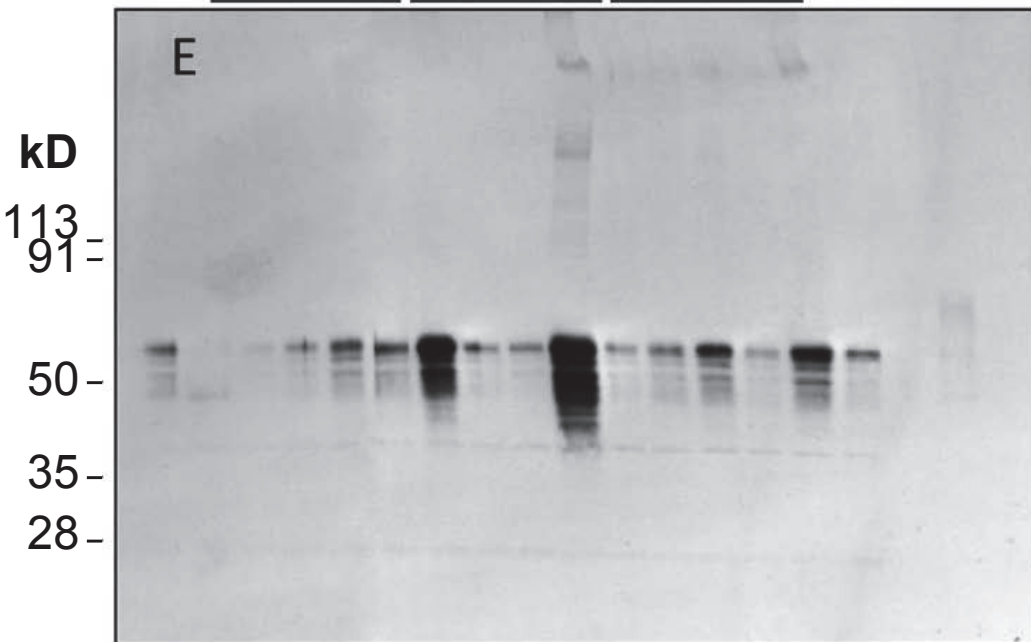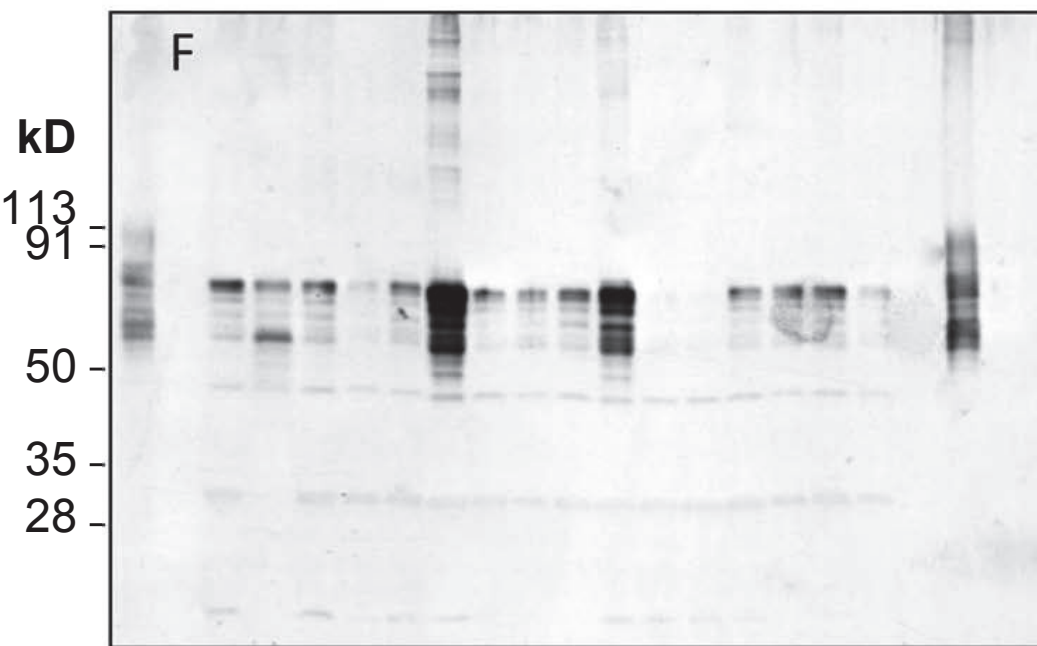

Fig S2 EF

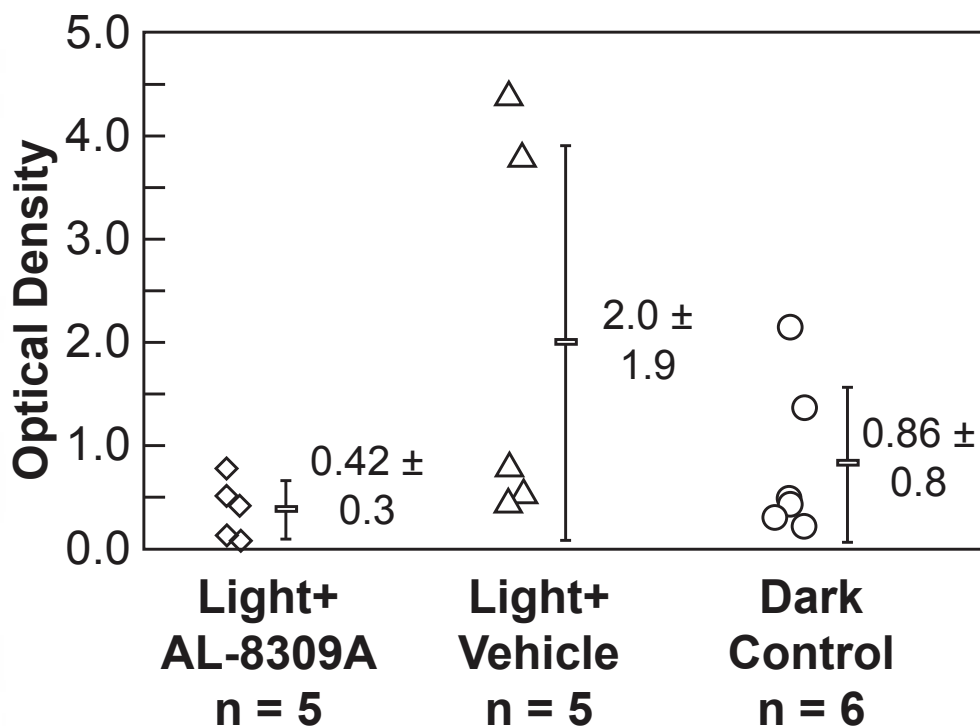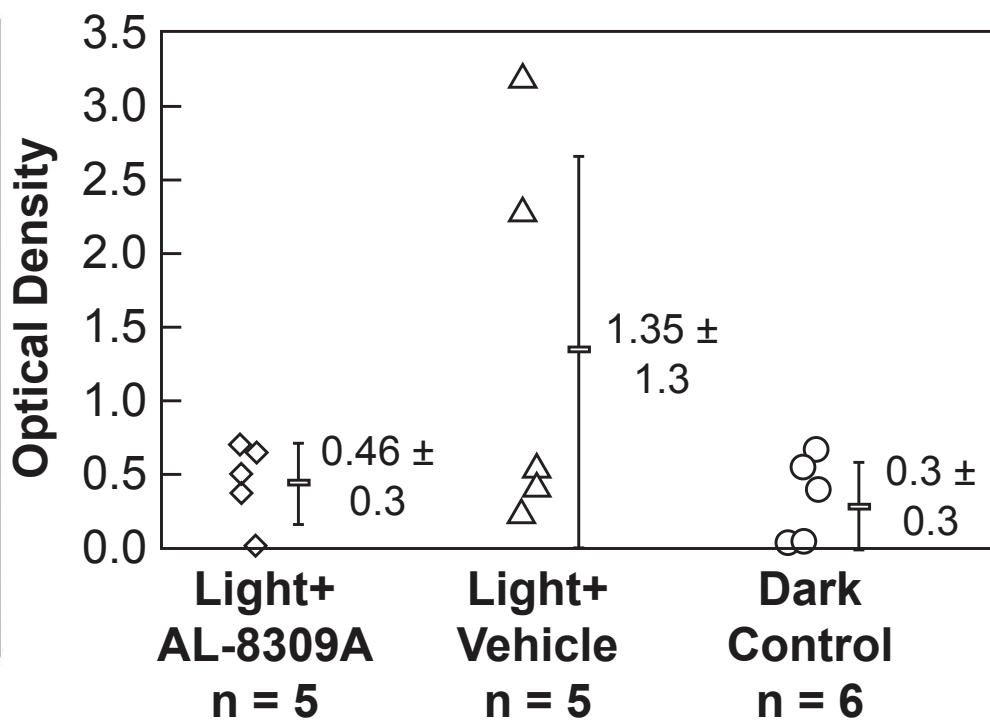

Fig S2 G

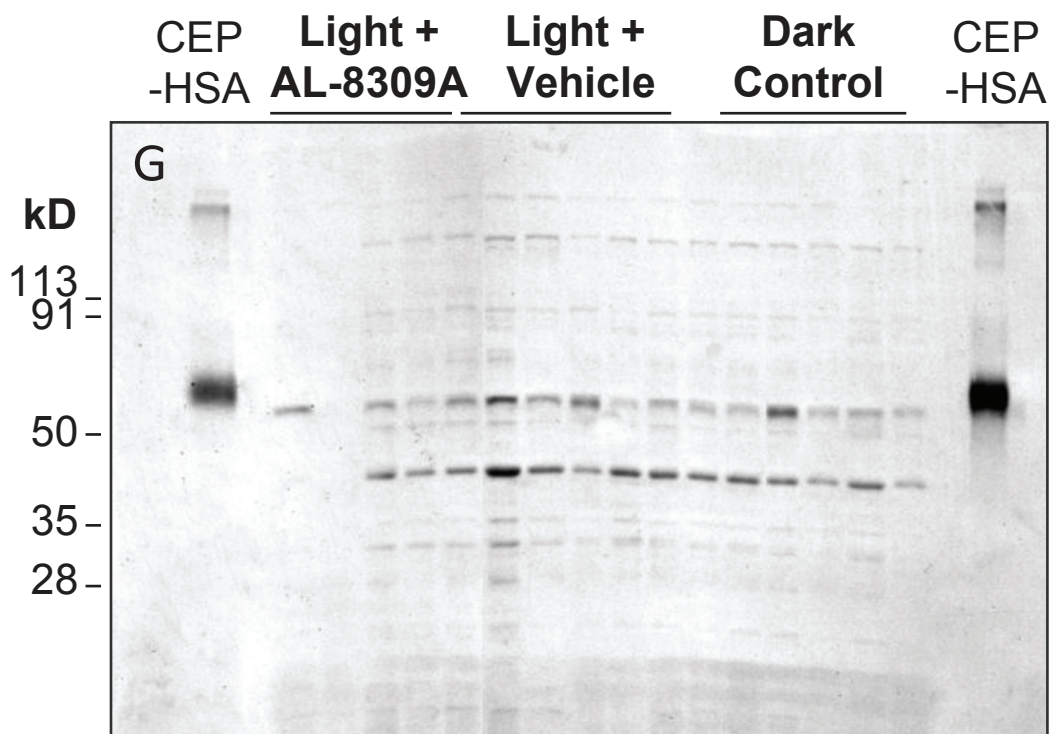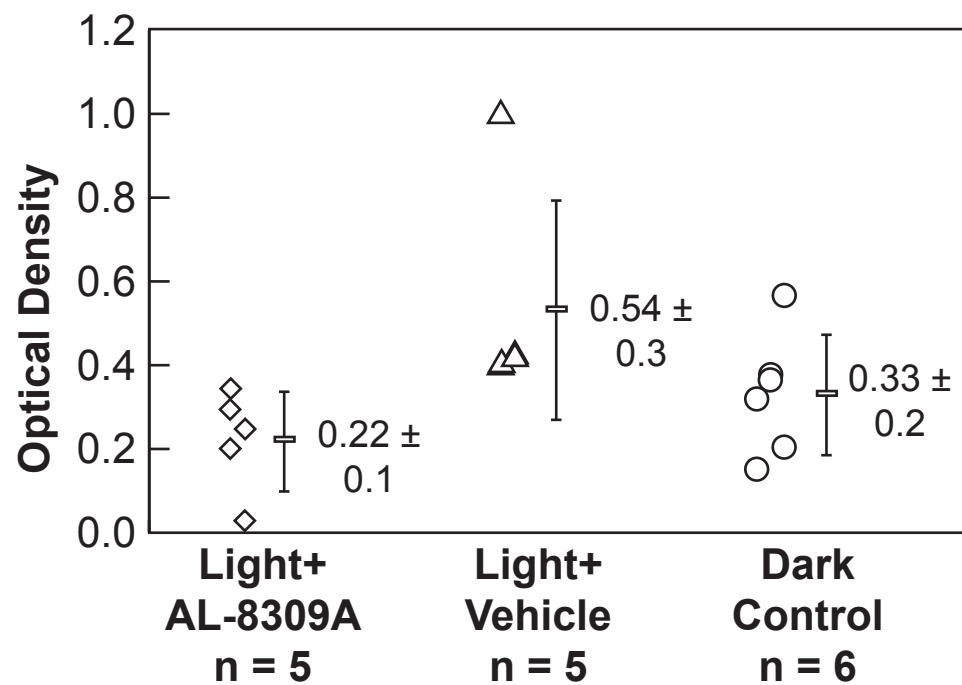

Fig S2 HI

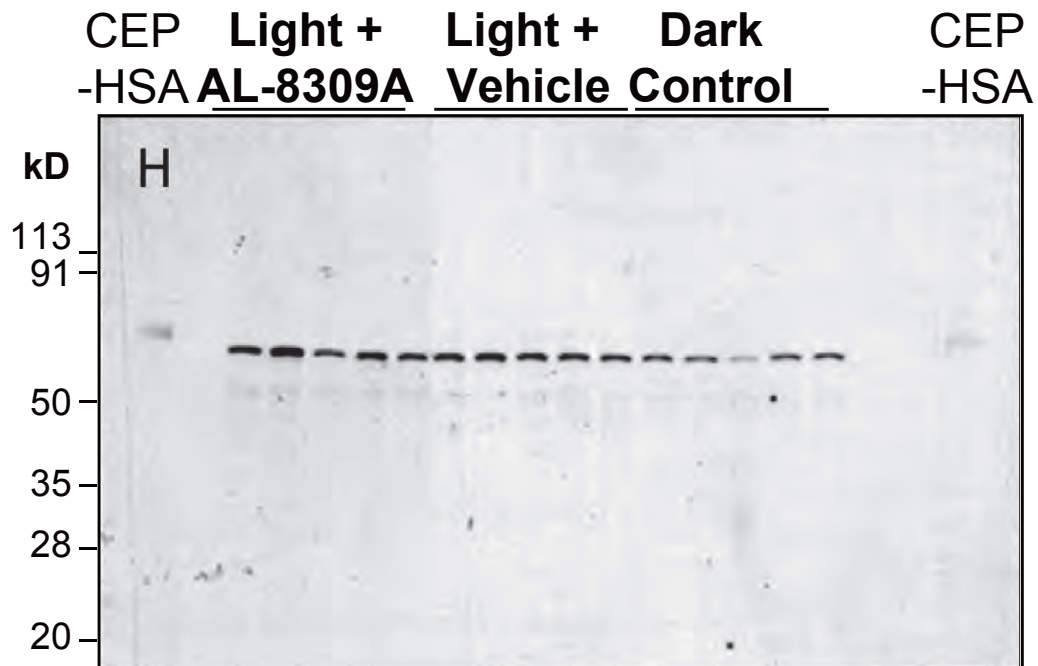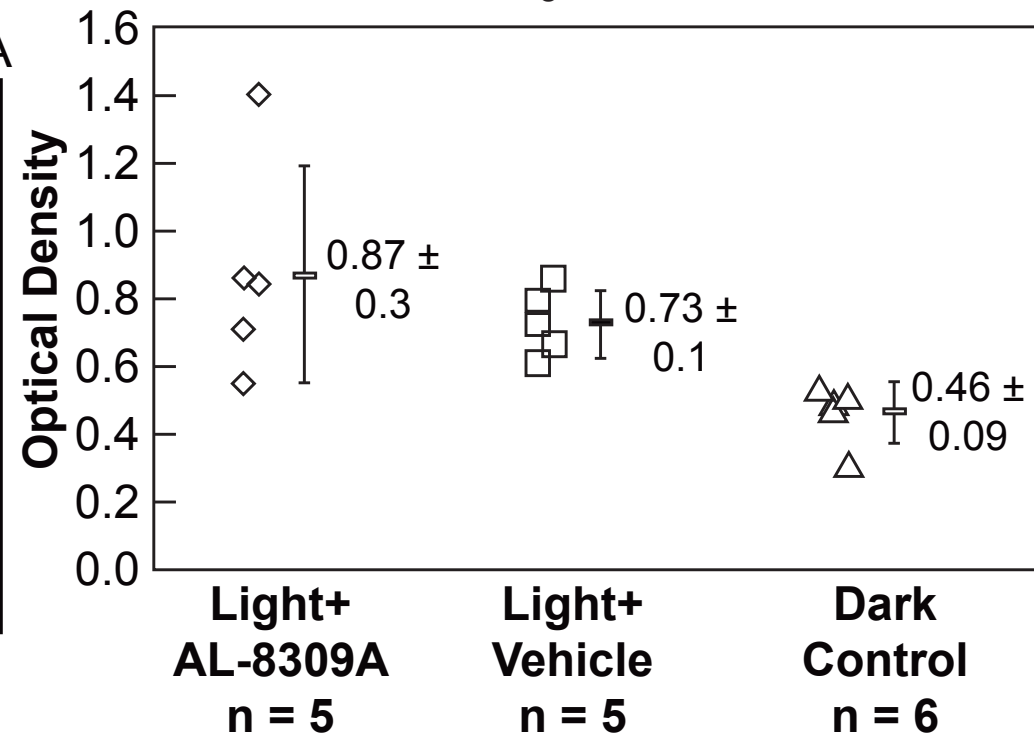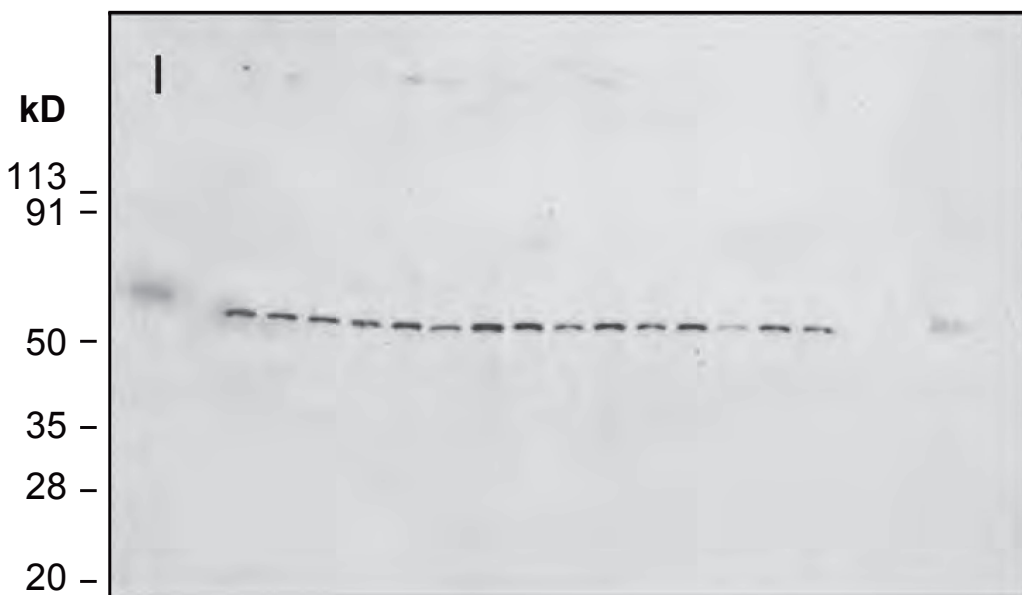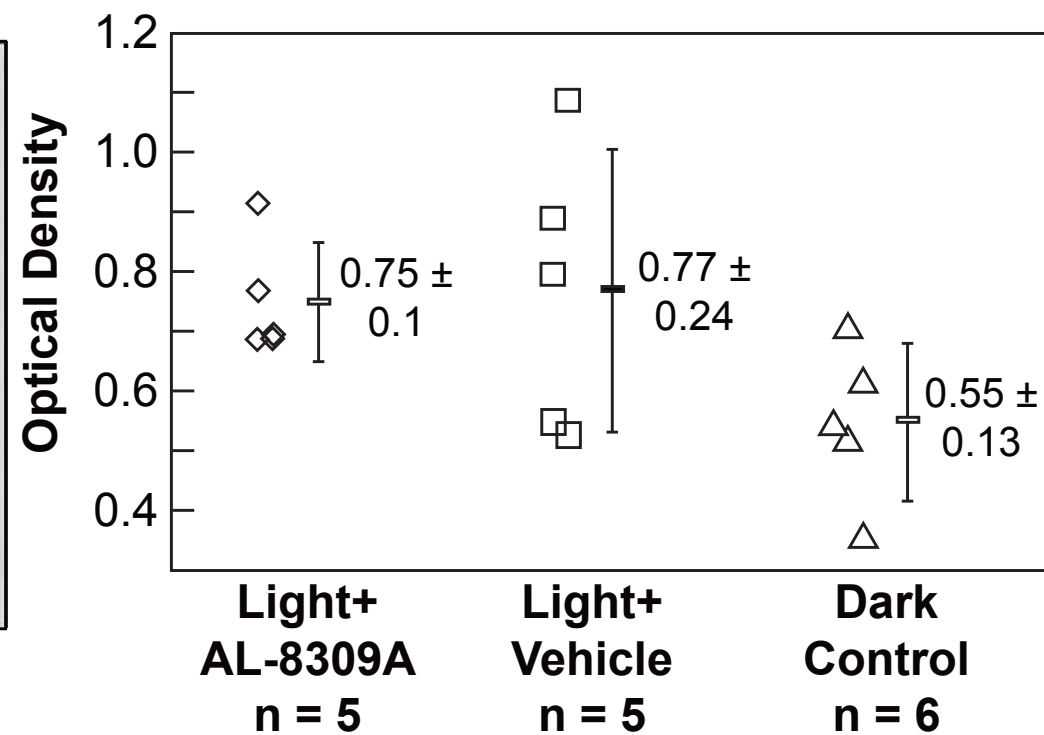

Fig S2 JK

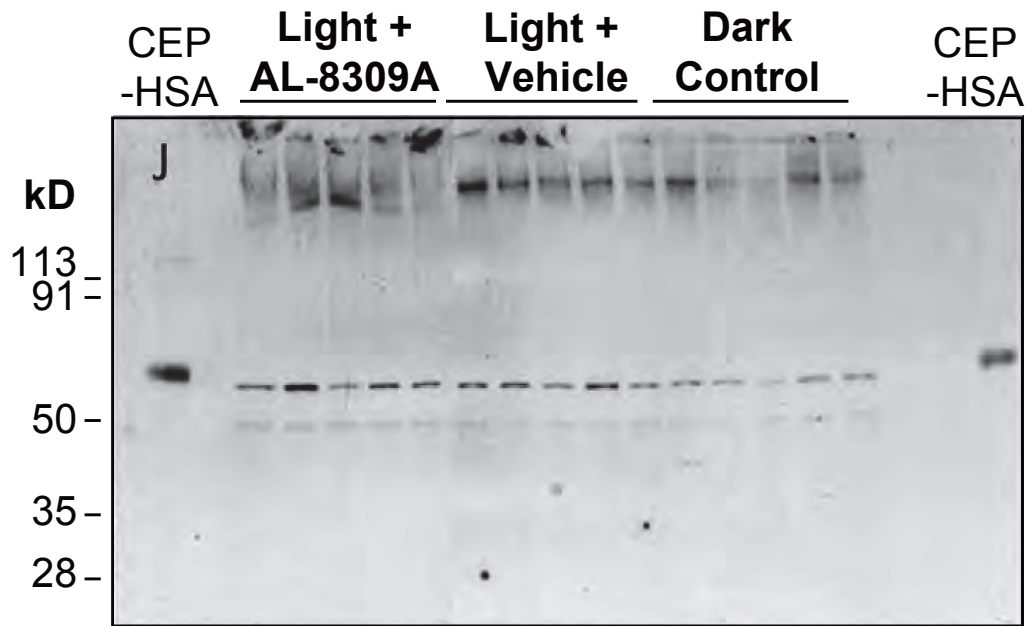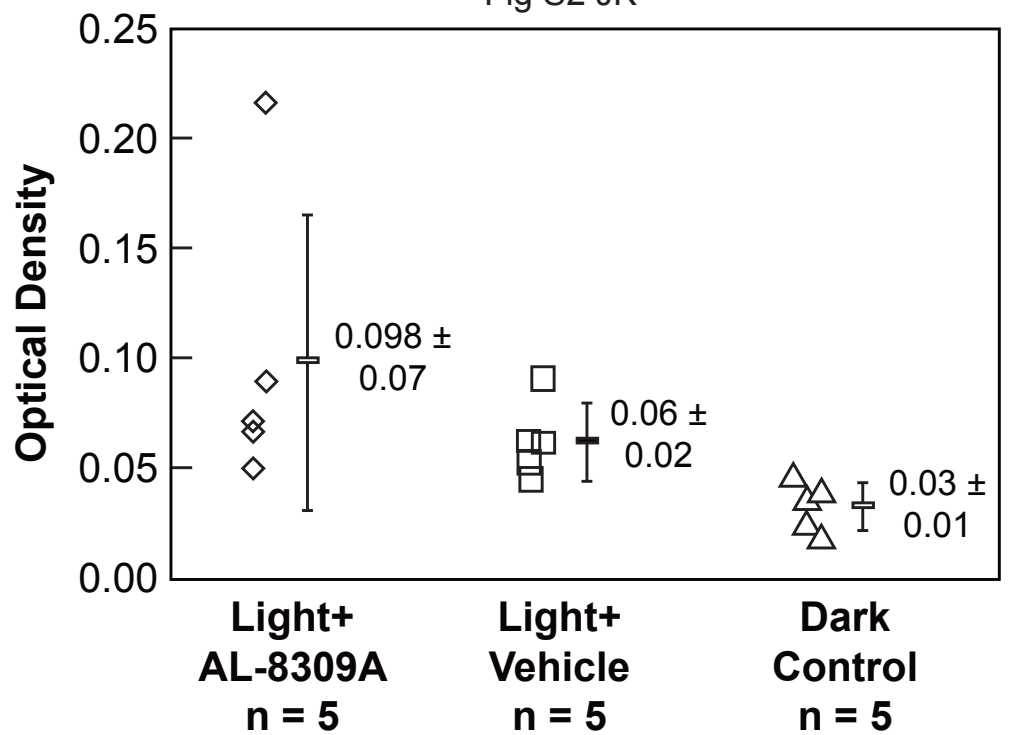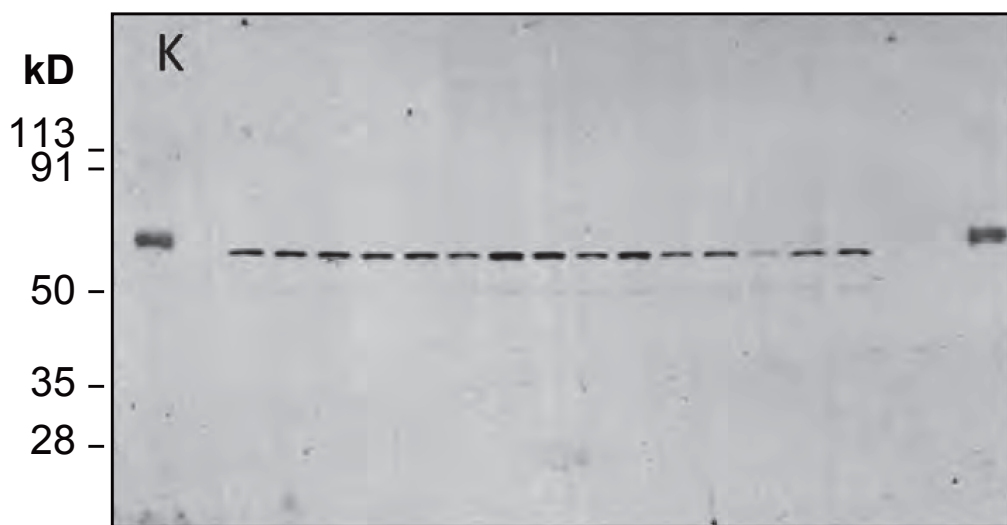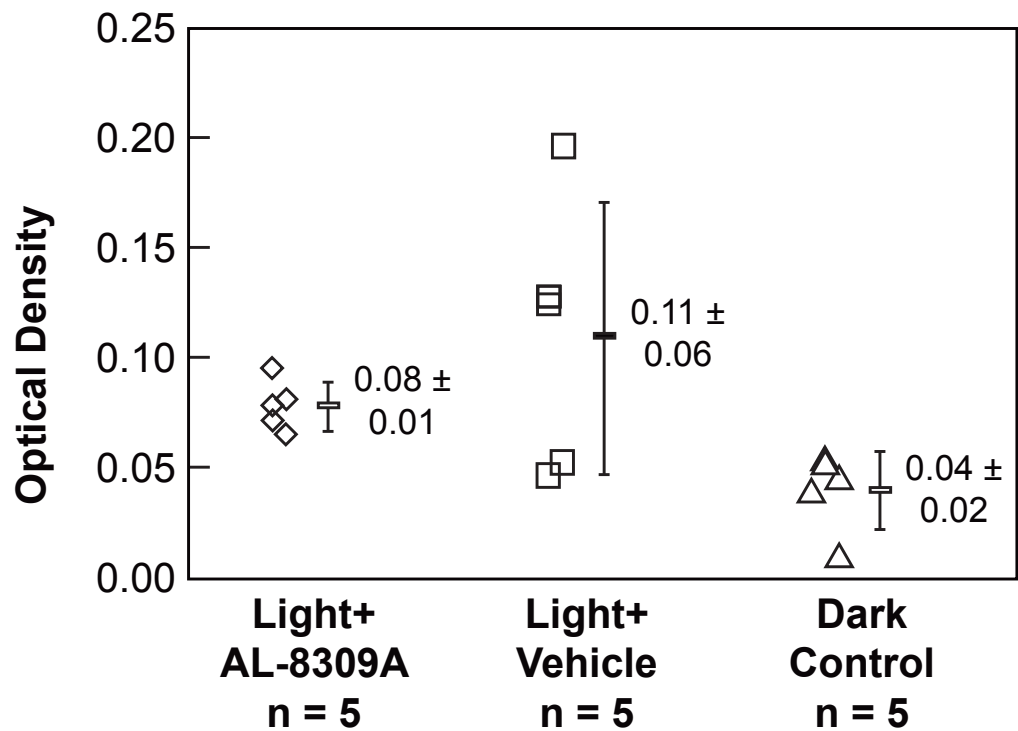

CEP  
-HSA    **Light +**  
**AL-8309A**    **Light +**  
**Vehicle**    **Dark**  
**Control**

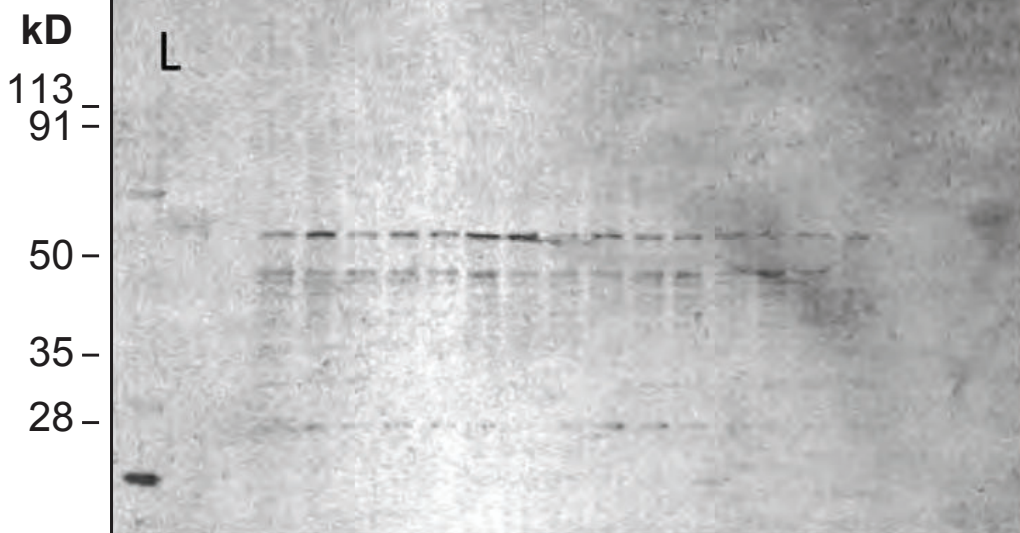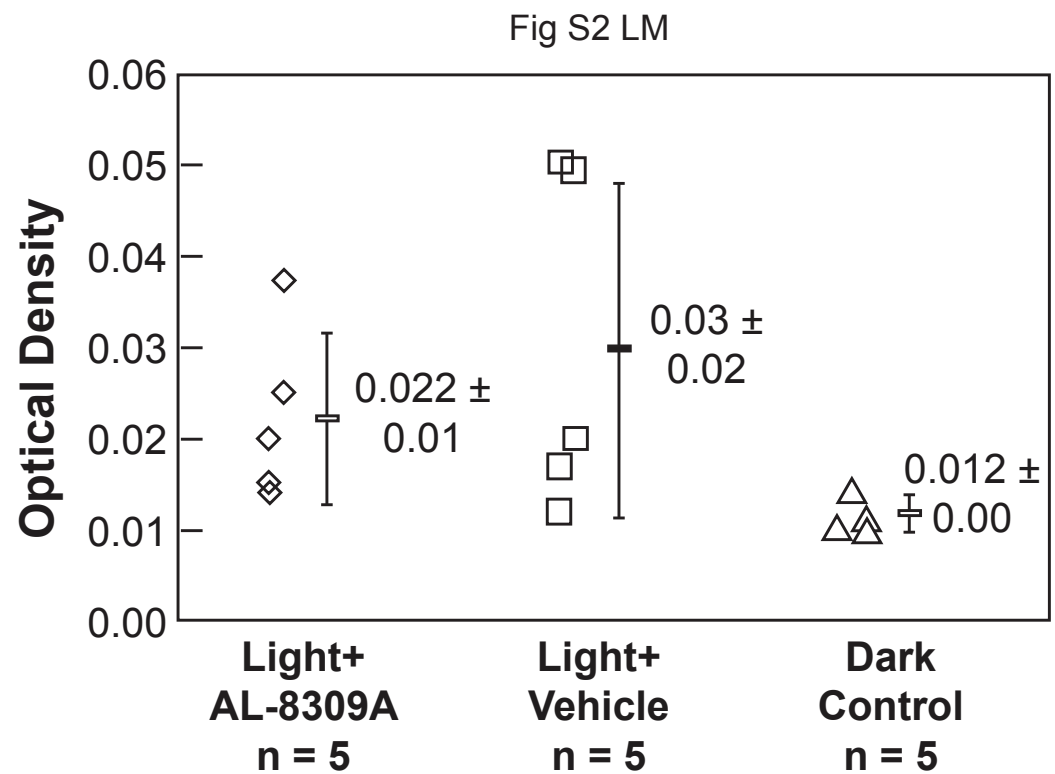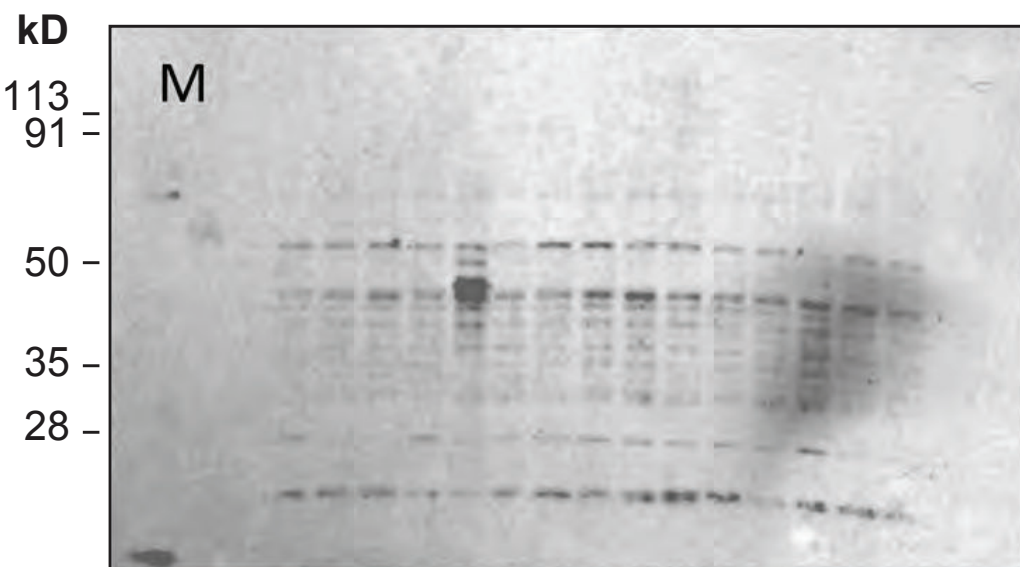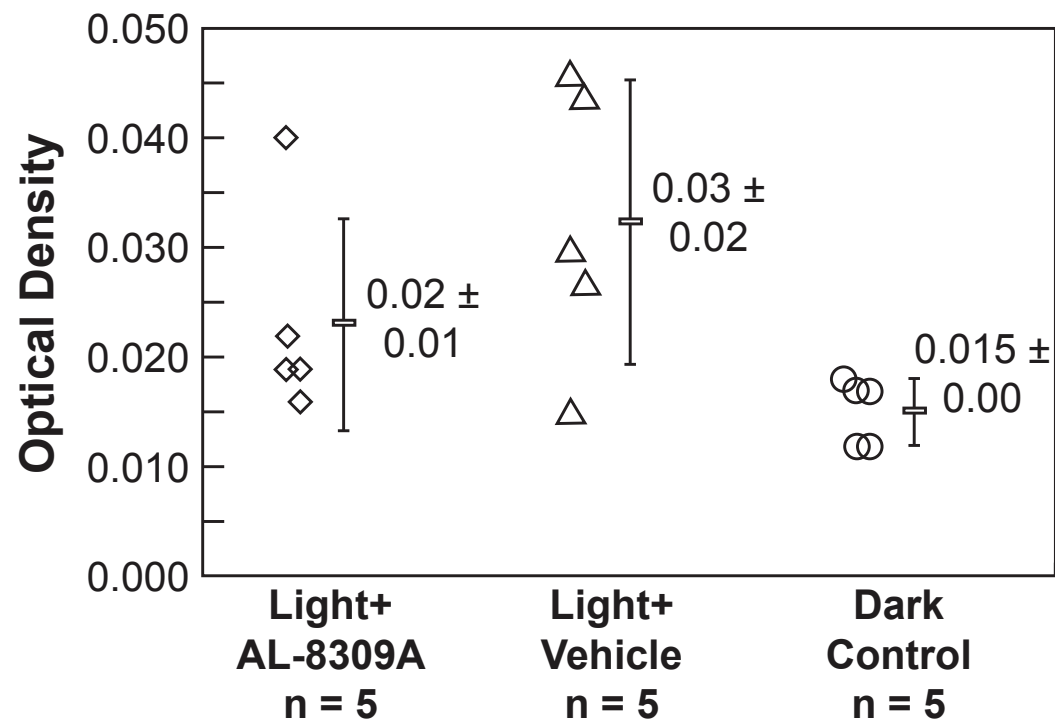



Fig S2 NO

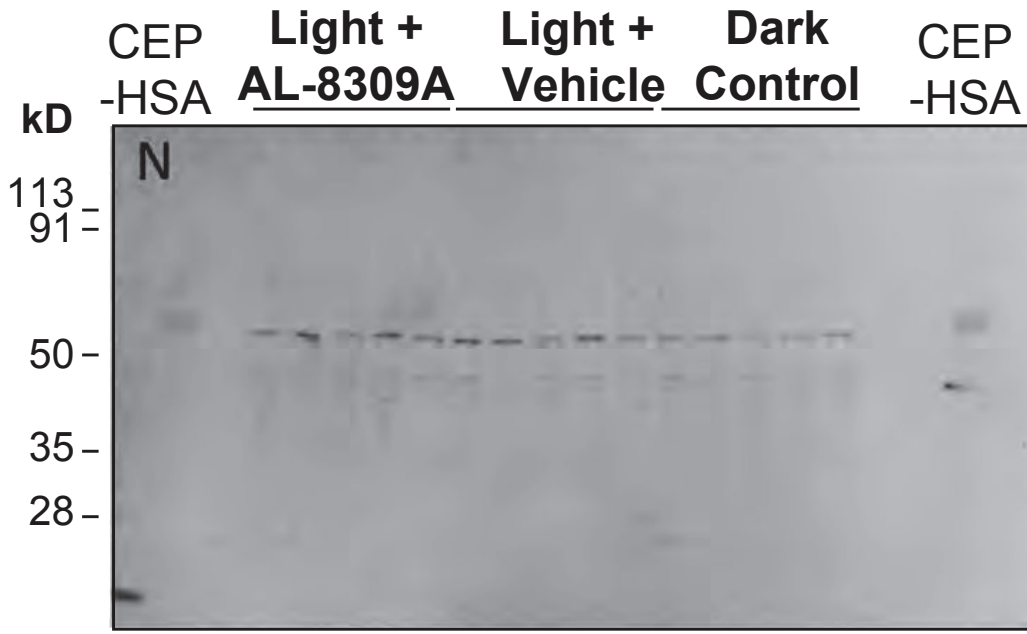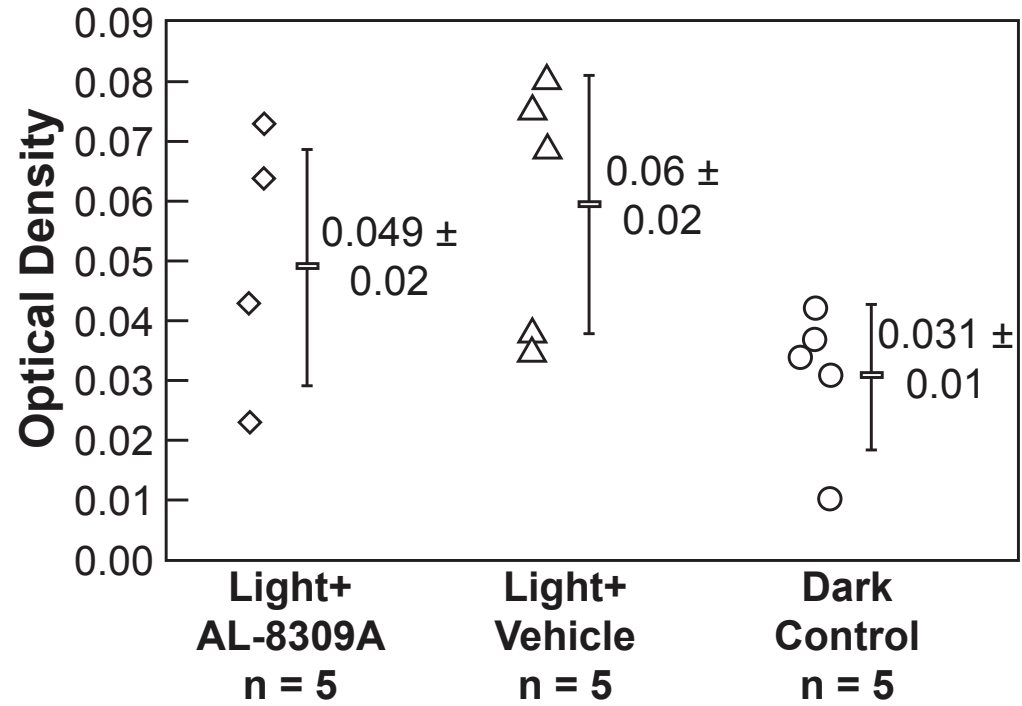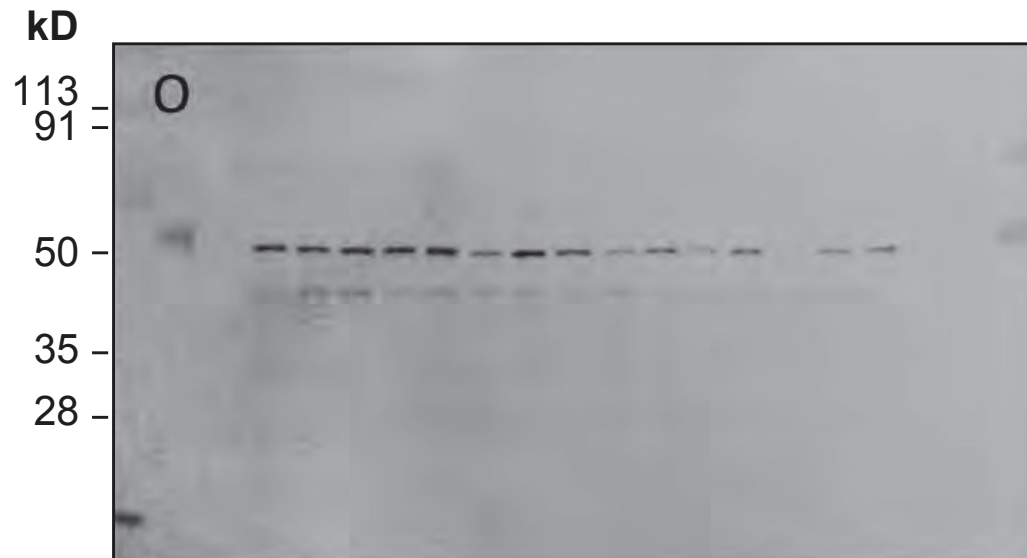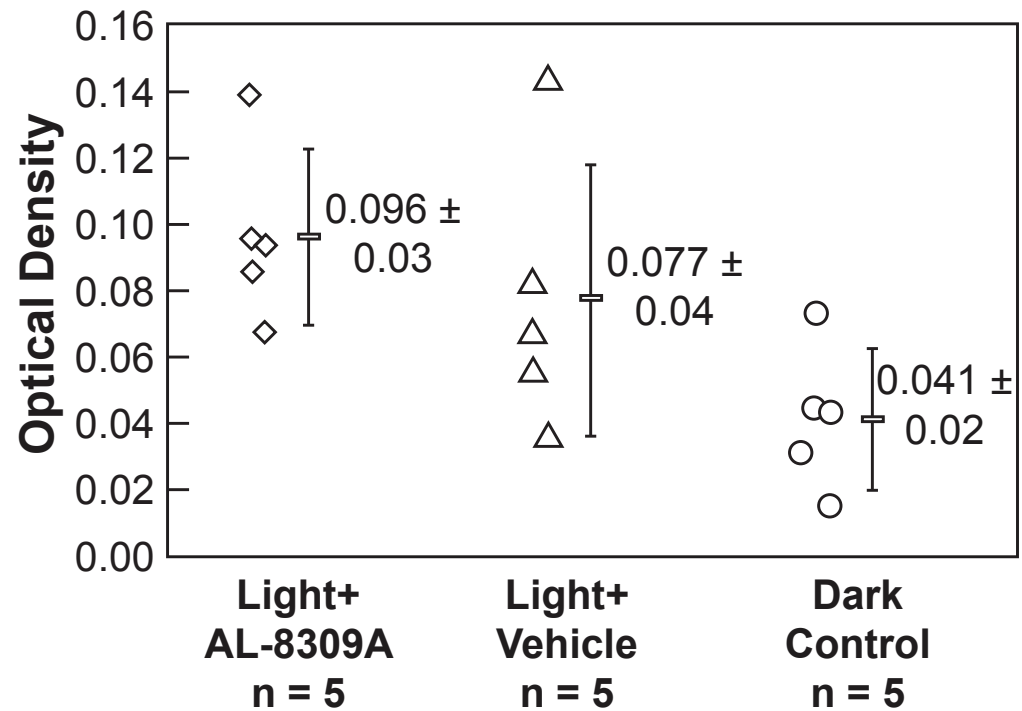

**P** CEP -HSA    Light + AL-8309A    Light + Vehicle    Dark Control

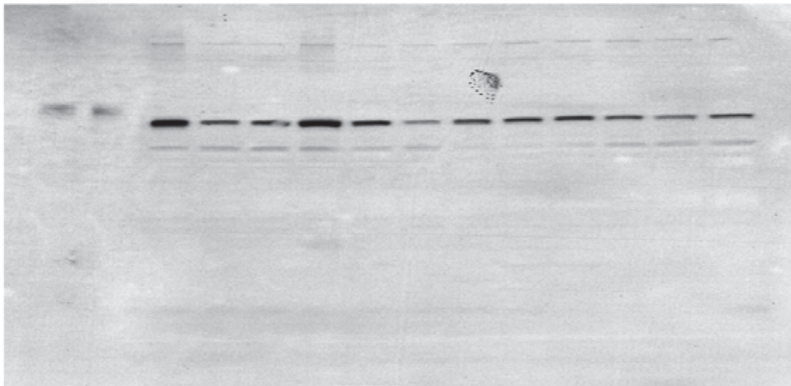

CEP -HSA    Light + AL-8309A    Light + Vehicle    Dark Control

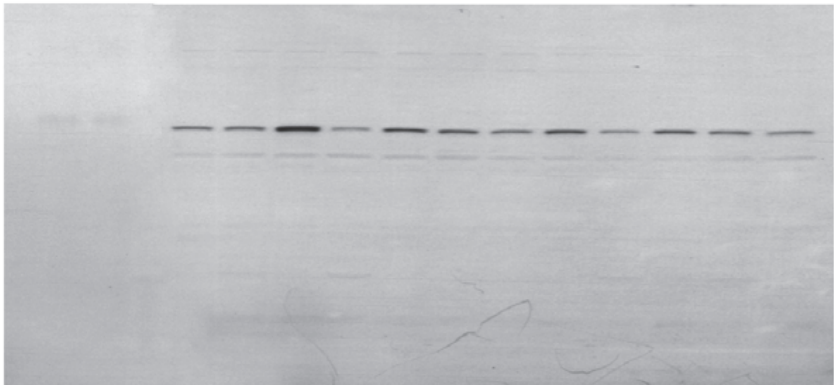

CEP -HSA    Light + AL-8309A    Light + Vehicle    Dark Control

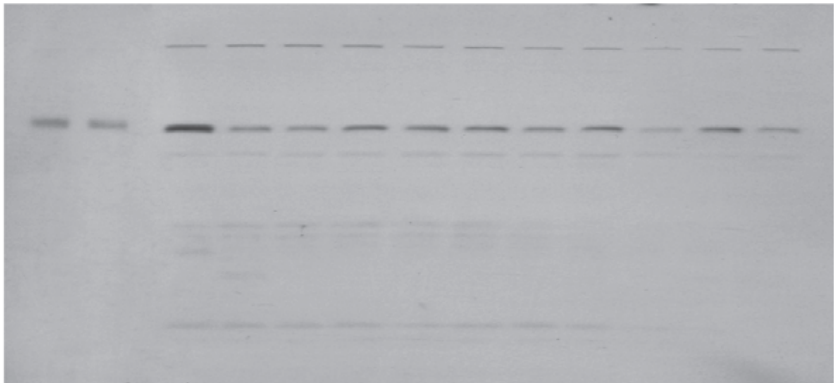

Fig S2 P

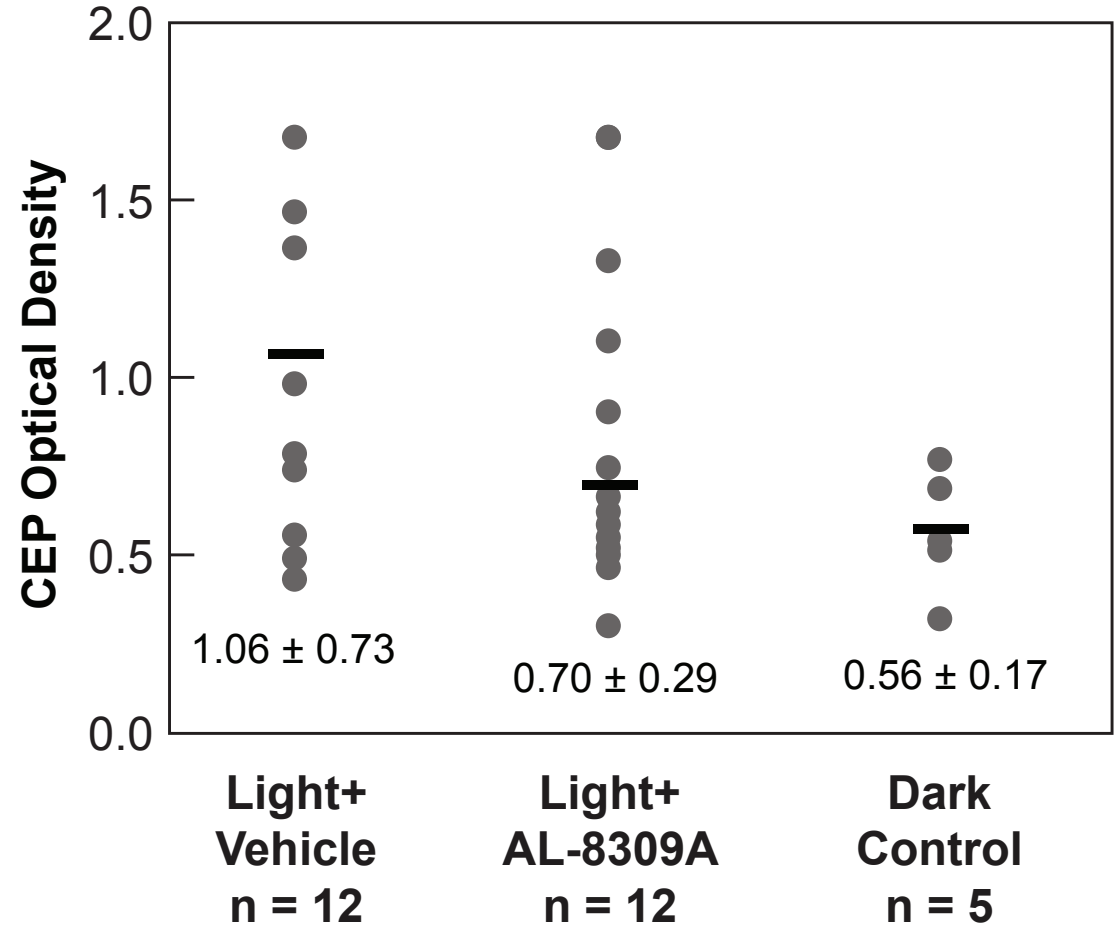

Q

CEP      Light +      Light +      Dark  
 -HSA    AL-8309A    Vehicle    Control

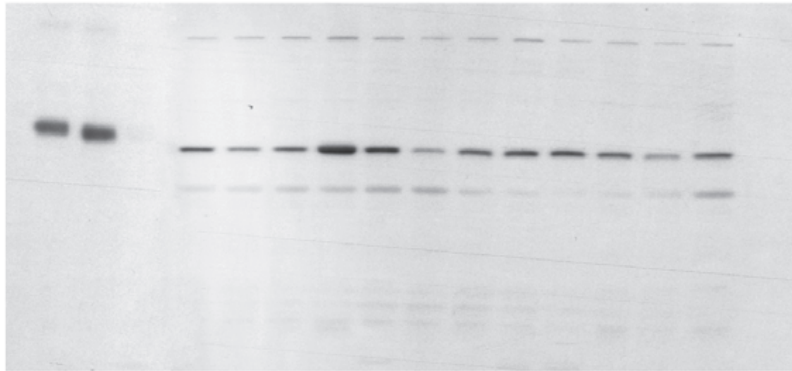

CEP      Light +      Light +      Dark  
 -HSA    AL-8309A    Vehicle    Control

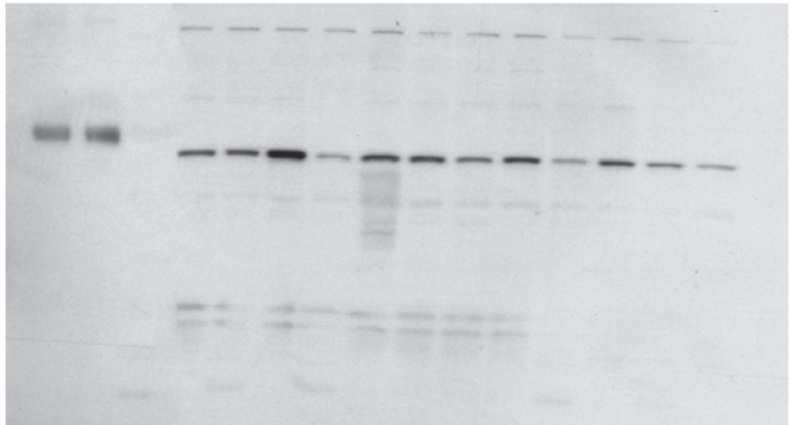

CEP      Light +      Light +      Dark  
 -HSA    AL-8309A    Vehicle    Control

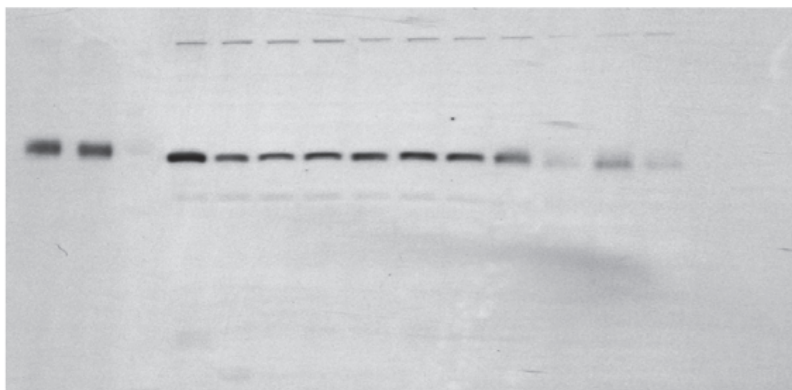

Fig S2 Q

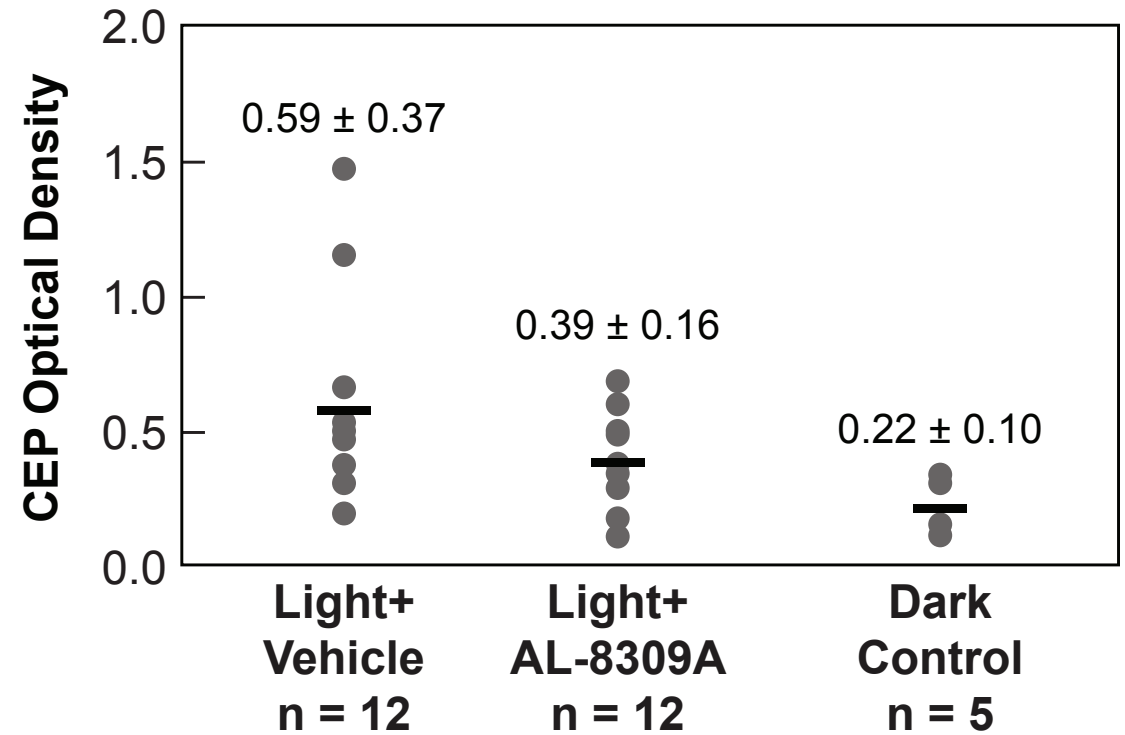

Supplement: pone.0076325.s002.pdf [file pone.0076325.s002.pdf]
