# Supplementary material for: CEP Biomarkers as Potential Tools for Monitoring Therapeutics
Source: PubMed Central journal article supplement (PMC3788138; doi:10.1371/journal.pone.0076325), 2013-10-01
Supplement: pone.0076325.s003.pdf [file pone.0076325.s003.pdf]

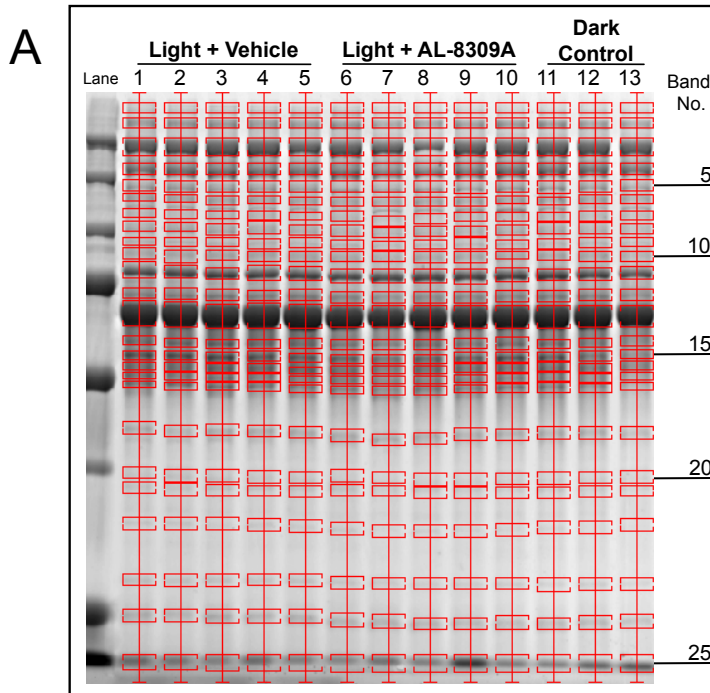

**B**

| Band                 | Quantity by Coomassie Blue Staining Intensity |                |                |                |                |                  |                |                |                |                |                |                |                |
|----------------------|-----------------------------------------------|----------------|----------------|----------------|----------------|------------------|----------------|----------------|----------------|----------------|----------------|----------------|----------------|
|                      | Light + Vehicle                               |                |                |                |                | Light + AL-8309A |                |                |                |                | Dark Control   |                |                |
|                      | 1                                             | 2              | 3              | 4              | 5              | 6                | 7              | 8              | 9              | 10             | 11             | 12             | 13             |
| 1                    | 30.15                                         | 30.54          | 29.62          | 30.27          | 31.46          | 31.14            | 31.17          | 30.80          | 30.25          | 31.89          | 29.37          | 31.75          | 29.82          |
| 2                    | 60.05                                         | 61.36          | 58.20          | 59.64          | 59.47          | 58.31            | 60.35          | 59.50          | 63.06          | 61.37          | 63.94          | 61.74          | 60.79          |
| 3                    | 167.57                                        | 165.14         | 171.26         | 168.14         | 159.96         | 169.02           | 161.46         | 126.92         | 168.59         | 170.46         | 170.54         | 166.30         | 162.23         |
| 4                    | 99.83                                         | 97.00          | 97.22          | 97.32          | 94.99          | 93.38            | 82.72          | 81.04          | 92.53          | 97.65          | 100.68         | 99.31          | 97.37          |
| 5                    | 58.72                                         | 59.26          | 60.11          | 60.03          | 60.08          | 58.48            | 58.48          | 59.53          | 59.59          | 61.83          | 62.70          | 58.27          | 60.85          |
| 6                    | 47.52                                         | 46.73          | 47.84          | 46.10          | 46.13          | 45.00            | 41.96          | 49.90          | 43.84          | 45.71          | 44.99          | 50.11          | 45.16          |
| 7                    | 43.36                                         | 40.13          | 37.49          | 42.35          | 35.19          | 46.93            | 40.87          | 37.67          | 39.60          | 41.64          | 38.94          | 43.42          | 36.22          |
| 8                    | 49.80                                         | 49.68          | 50.53          | 48.43          | 52.82          | 55.34            | 47.94          | 49.60          | 49.36          | 52.64          | 54.04          | 51.50          | 50.92          |
| 9                    | 38.88                                         | 38.24          | 38.00          | 37.85          | 41.43          | 41.43            | 37.79          | 37.50          | 48.74          | 41.74          | 39.78          | 44.65          | 35.83          |
| 10                   | 52.42                                         | 52.37          | 53.25          | 52.18          | 52.15          | 55.44            | 54.99          | 53.57          | 54.24          | 55.40          | 55.24          | 56.18          | 57.22          |
| 11                   | 125.13                                        | 126.88         | 128.31         | 125.27         | 128.24         | 128.74           | 129.82         | 136.06         | 129.59         | 127.81         | 128.68         | 127.30         | 129.36         |
| 12                   | 83.51                                         | 89.28          | 83.64          | 80.82          | 84.13          | 85.26            | 74.73          | 82.73          | 85.05          | 88.19          | 89.29          | 87.66          | 85.50          |
| 13                   | 348.27                                        | 349.15         | 346.12         | 338.07         | 330.75         | 349.77           | 333.63         | 349.83         | 330.10         | 337.27         | 334.97         | 339.31         | 338.27         |
| 14                   | 86.10                                         | 85.84          | 86.36          | 84.41          | 86.44          | 85.17            | 85.00          | 89.09          | 83.96          | 82.33          | 79.46          | 84.73          | 84.16          |
| 15                   | 89.03                                         | 87.26          | 89.53          | 91.01          | 91.54          | 85.45            | 76.52          | 84.84          | 84.42          | 93.88          | 78.78          | 79.45          | 82.10          |
| 16                   | 67.04                                         | 65.46          | 68.42          | 66.52          | 67.61          | 62.81            | 65.36          | 63.34          | 62.27          | 74.88          | 73.23          | 69.68          | 70.64          |
| 17                   | 54.32                                         | 57.63          | 58.32          | 55.79          | 56.24          | 66.89            | 59.83          | 63.39          | 64.03          | 64.04          | 63.22          | 57.83          | 54.03          |
| 18                   | 59.57                                         | 60.63          | 59.18          | 61.28          | 60.85          | 61.05            | 65.60          | 70.29          | 62.54          | 70.89          | 68.88          | 68.14          | 62.13          |
| 19                   | 52.03                                         | 49.26          | 52.25          | 53.15          | 53.44          | 59.02            | 52.43          | 57.29          | 55.92          | 51.23          | 53.51          | 52.23          | 50.69          |
| 20                   | 38.58                                         | 39.52          | 37.51          | 36.22          | 36.79          | 41.38            | 33.95          | 37.90          | 38.45          | 35.07          | 36.17          | 32.67          | 33.28          |
| 21                   | 35.34                                         | 34.10          | 38.14          | 33.26          | 33.66          | 35.62            | 37.22          | 36.60          | 36.54          | 32.99          | 33.81          | 35.93          | 34.60          |
| 22                   | 39.70                                         | 40.00          | 39.73          | 40.59          | 38.91          | 40.70            | 33.75          | 35.30          | 34.36          | 32.54          | 30.01          | 28.59          | 28.79          |
| 23                   | 36.30                                         | 38.27          | 36.87          | 38.45          | 39.95          | 42.54            | 39.18          | 36.49          | 36.77          | 34.47          | 33.02          | 34.17          | 32.85          |
| 24                   | 57.54                                         | 55.55          | 59.44          | 57.08          | 55.76          | 57.66            | 57.98          | 50.57          | 50.11          | 57.07          | 55.27          | 58.78          | 52.38          |
| 25                   | 113.22                                        | 115.77         | 115.36         | 114.21         | 114.71         | 118.53           | 122.94         | 116.14         | 169.56         | 108.20         | 107.20         | 114.12         | 122.40         |
| 26                   | 30.15                                         | 30.54          | 29.62          | 30.27          | 31.46          | 31.14            | 31.17          | 30.80          | 30.25          | 31.89          | 29.37          | 31.75          | 29.82          |
| 27                   | 60.05                                         | 61.36          | 58.20          | 59.64          | 59.47          | 58.31            | 60.35          | 59.50          | 63.06          | 61.37          | 63.94          | 61.74          | 60.79          |
| 28                   | 167.57                                        | 165.14         | 171.26         | 168.14         | 159.96         | 169.02           | 161.46         | 126.92         | 168.59         | 170.46         | 170.54         | 166.30         | 162.23         |
| 29                   | 99.83                                         | 97.00          | 97.22          | 97.32          | 94.99          | 93.38            | 82.72          | 81.04          | 92.53          | 97.65          | 100.68         | 99.31          | 97.37          |
| 30                   | 58.72                                         | 59.26          | 60.11          | 60.03          | 60.08          | 58.48            | 58.48          | 59.53          | 59.59          | 61.83          | 62.70          | 58.27          | 60.85          |
| <b>Lane Totals</b>   | <b>1933.97</b>                                | <b>1935.04</b> | <b>1942.72</b> | <b>1918.42</b> | <b>1912.70</b> | <b>1975.07</b>   | <b>1885.65</b> | <b>1895.87</b> | <b>1973.46</b> | <b>1951.19</b> | <b>1925.70</b> | <b>1933.82</b> | <b>1897.59</b> |
| <b>Group Average</b> |                                               |                | <b>1928.57</b> |                |                |                  |                | <b>1936.25</b> |                |                |                | <b>1919.04</b> |                |
| <b>SD</b>            |                                               |                | <b>12.51</b>   |                |                |                  |                | <b>42.74</b>   |                |                |                | <b>19.01</b>   |                |
| <b>RSD</b>           |                                               |                | <b>0.65%</b>   |                |                |                  |                | <b>2.21%</b>   |                |                |                | <b>0.99%</b>   |                |

0.42 = p-value [Light + Vehicle] vs [Dark Control]  
 0.54 = p-value [Light + AL-8309A] vs [Dark Control]  
 0.71 = p-value [Light+Vehicle] vs [Light+AL-8309A]

**Supporting Figure S3. Coomassie Blue Staining as Loading Control for Figure 4.**

(A) Coomassie blue staining intensity of the indicated SDS-PAGE bands in hardcopy Figure 4B was quantified using Quantity One software (BioRad). (B) The quantity of each highlighted band is listed in arbitrary units along with the sum total per lane, as well as the average total lane quantity, standard deviation (SD) and relative standard deviation (RSD) for the groups Light + Vehicle, Light + AL-8309A, Dark Control. Also shown are p-values (2 sided t-test) for comparison of total lane quantities between the three experimental groups. The statistical analyses reveal relatively low variability and no significant differences in total staining intensity between the experimental groups. Overall, Coomassie blue staining intensity supports approximately equal amounts of protein applied per lane.
