# Supplementary material for: CEP Biomarkers as Potential Tools for Monitoring Therapeutics
Source: PubMed Central journal article supplement (PMC3788138; doi:10.1371/journal.pone.0076325), 2013-10-01
Supplement: pone.0076325.s006.pdf [file pone.0076325.s006.pdf]

**Supporting Table S2**  
**Log CEP Autoantibody Titer**

| <b>Experiment</b>          | <b>Light + AL8309A</b> | <b>Light + Vehicle</b> | <b>Dark control</b> |
|----------------------------|------------------------|------------------------|---------------------|
| Experiment 1<br>analysis 1 | -0.317                 | 0.147                  | 0.039               |
|                            | 0.104                  | -0.212                 | 0.039               |
|                            | -0.058                 | -0.103                 | -0.103              |
|                            | -0.058                 | -0.080                 | -0.182              |
|                            | -0.080                 | -0.154                 | 0.185               |
|                            |                        |                        | 0.022               |
| Experiment 1<br>analysis 2 | -0.269                 | 0.233                  | 0.152               |
|                            | 0.104                  | -0.135                 | -0.010              |
|                            | -0.080                 | -0.032                 | -0.056              |
|                            | -0.135                 | -0.056                 | -0.197              |
|                            | -0.135                 | -0.080                 | 0.121               |
|                            |                        |                        | -0.010              |
| Experiment 2<br>analysis 1 | -0.166                 | 0.533                  | [0.405]             |
|                            | -0.099                 | [0.749]                | 0.026               |
|                            | [0.513]                | 0.135                  | -0.079              |
|                            | 0.311                  | 0.503                  | 0.070               |
|                            | -0.120                 | 0.056                  | [-0.421]            |
| Experiment 2<br>analysis 2 | 0.106                  | 0.459                  | [0.285]             |
|                            | 0.285                  | [0.777]                | -0.009              |
|                            | 0.421                  | 0.153                  | -0.081              |
|                            | 0.095                  | 0.250                  | -0.009              |
|                            | -0.185                 | -0.097                 | -0.185              |
| Experiment 3<br>analysis 1 | -0.115                 | -0.122                 | 0.023               |
|                            | -0.088                 | 0.310                  | 0.057               |
|                            | -0.175                 | 0.034                  | 0.112               |
|                            | -0.058                 | 0.182                  | -0.014              |
|                            | 0.008                  | 0.003                  | -0.179              |
|                            | -0.269                 | -0.034                 |                     |
|                            | -0.148                 | 0.081                  |                     |
|                            | 0.142                  | 0.257                  |                     |
|                            | 0.102                  | -0.070                 |                     |
| Experiment 3<br>analysis 2 | 0.132                  | -0.003                 | -0.057              |
|                            | 0.280                  | 0.162                  | 0.040               |
|                            | -0.270                 | -0.007                 | 0.104               |
|                            | -0.006                 | -0.005                 | -0.086              |
|                            | 0.092                  | 0.010                  |                     |
|                            | 0.154                  | 0.119                  |                     |
|                            | 0.075                  | 0.218                  |                     |
|                            | 0.133                  | 0.342                  |                     |
|                            | 0.201                  | -0.180                 |                     |
|                            | -0.076                 | 0.125                  |                     |
|                            |                        |                        | 0.005               |
| Mean (Log)                 | 0.008                  | 0.115                  | 0.000               |
| SD                         | 0.189                  | 0.240                  | 0.154               |
| Mean (Linear)              | 1.02                   | 1.30                   | 1.00                |
| RSD                        | 18.51%                 | 18.42%                 | 15.37%              |
| n                          | 22                     | 20                     | 16                  |
| <b>Outliers Removed</b>    |                        |                        |                     |
| n                          | 22                     | 19                     | 15                  |
| Mean (Log)                 | -0.004                 | 0.079                  | -0.010              |
| SD                         | 0.173                  | 0.190                  | 0.102               |
| Mean (Linear)              | 0.99                   | 1.20                   | 0.98                |
| RSD                        | 17.44%                 | 15.81%                 | 10.44%              |

CEP autoantibody titer in rat plasma was measured in three separate experiments by direct ELISA following *in vivo* blue light exposure with or without pretreatment with AL-8309A (ELISA method C in J Biol Chem 278, 42027). The titer was defined as the ratio of plasma binding to antigen (A) versus binding to BSA (A<sub>0</sub>) where the antigen was the plate coating agent CEP-BSA. Log transformed data are shown after normalization to the dark control mean value per analysis. The number of animals (n), the standard deviation (SD) and the relative standard deviation (RSD) are indicated. Outliers were identified [values in brackets] using the interquartile method. Log mean values were transformed to linear scale.
